# Supplementary material for: RNA-sequencing analysis reveals the potential contribution of lncRNAs in palmitic acid-induced insulin resistance of skeletal muscle cells
Source: Oxford University Press journal article supplement (doi:10.1042/bsr20192523), 2019-12-13

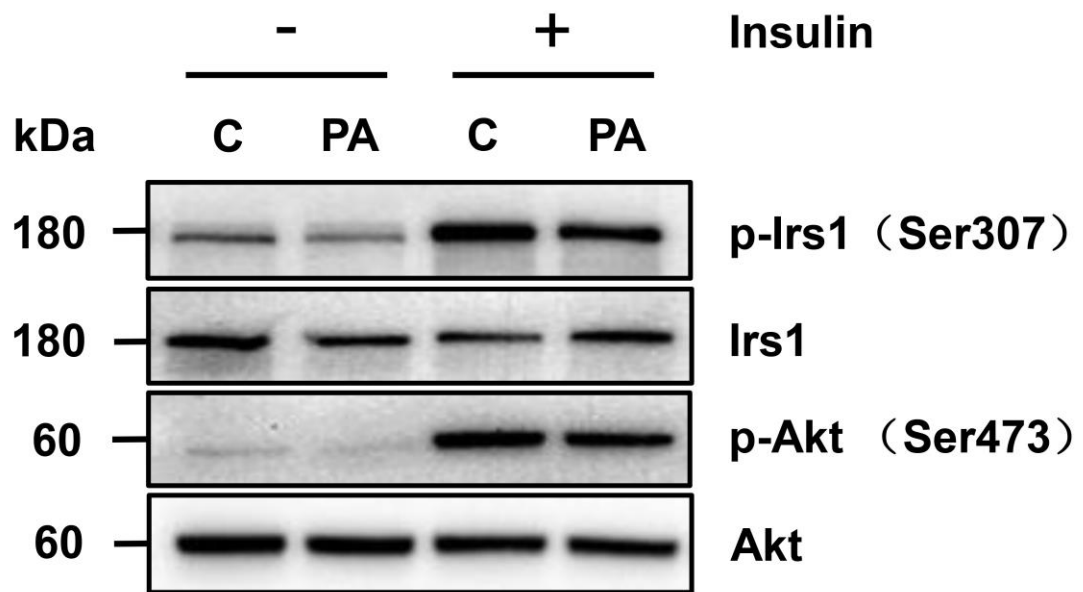

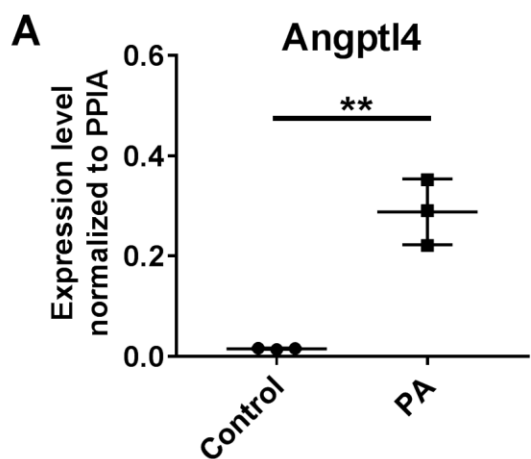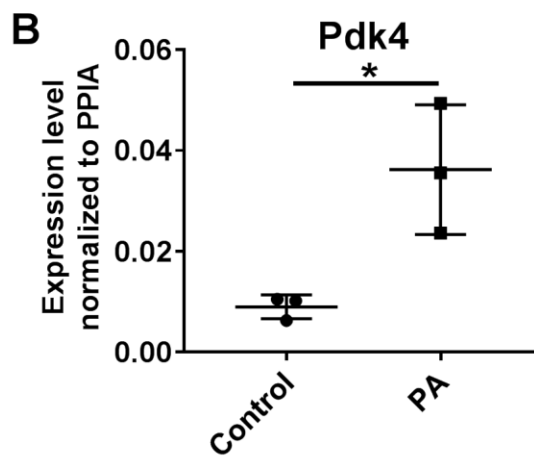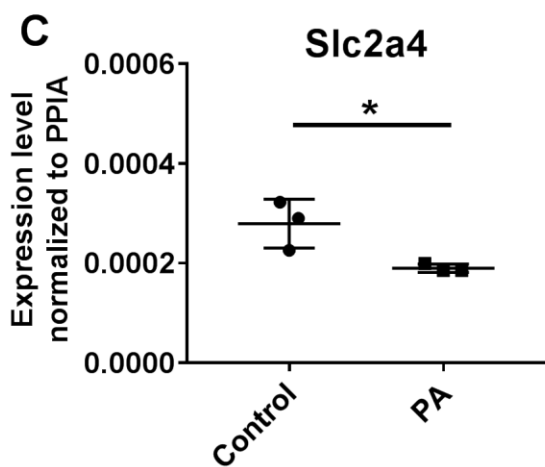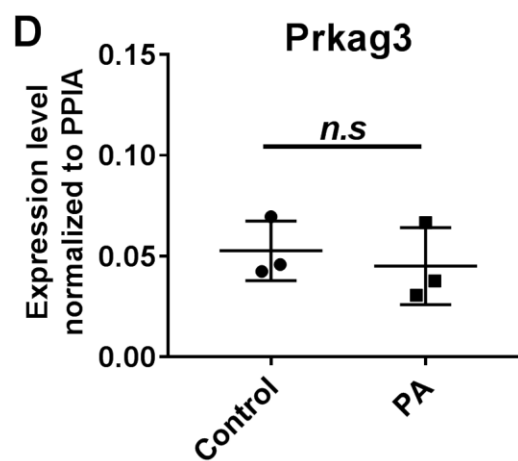

Supplement: bsr-2019-2523_supp.pdf [file bsr-2019-2523_supp.pdf]
